# Supplementary material for: Genomic Tools and Selective Breeding in Molluscs
Source: Front Genet. 2018 Jul 18;9:253. doi: 10.3389/fgene.2018.00253 (PMC6058216; doi:10.3389/fgene.2018.00253)
Supplement: Supplementary file 1 [file Data_Sheet_1.XLSX]

## Sheet: Heritability
common.name	scientific.name	trait	type	n	value	error	reference	estimation*	molecular.pedigree	notes
Black-footed paua	Haliotis iris	Length	Narrow sense	18573	0.363333		Camara and Symonds 2014	Family variance components	Not reported	h2 and n are mean of 3 estimates
Black-footed paua	Haliotis iris	Weight	Narrow sense	17824	0.41		Camara and Symonds 2014	Family variance components	Not reported	h2 and n are mean of 3 estimates
Black-footed paua	Haliotis iris	Growth rate	Narrow sense	14183	0.4375		Camara and Symonds 2014	Family variance components	Not reported	h2 and n are mean of 4 estimates
Black-footed paua	Haliotis iris	Meat yield (harvest)	Narrow sense	5470	0.33		Camara and Symonds 2014	Family variance components	Not reported
Black-footed paua	Haliotis iris	Meat yield (bled)	Narrow sense	4850	0.31		Camara and Symonds 2014	Family variance components	Not reported
Black-footed paua	Haliotis iris	Foot darkness	Narrow sense	9783	0.58		Camara and Symonds 2014	Family variance components	Not reported
Green lipped mussel	Perna canaliculus	Shell length	Narrow sense	Not reported	0.41	0.074	Camara and Symonds 2014	Family variance components	Not reported
Green lipped mussel	Perna canaliculus	Shell depth	Narrow sense	Not reported	0.43	0.069	Camara and Symonds 2014	Family variance components	Not reported
Green lipped mussel	Perna canaliculus	Shell width	Narrow sense	Not reported	0.3	0.077	Camara and Symonds 2014	Family variance components	Not reported
Green lipped mussel	Perna canaliculus	Meat weight	Narrow sense	Not reported	0.17	0.064	Camara and Symonds 2014	Family variance components	Not reported
Green lipped mussel	Perna canaliculus	Shell strength	Narrow sense	Not reported	0.14	0.071	Camara and Symonds 2014	Family variance components	Not reported
Green lipped mussel	Perna canaliculus	Shell weight	Narrow sense	Not reported	0.37	0.0744	Camara and Symonds 2014	Family variance components	Not reported
Green lipped mussel	Perna canaliculus	Meat yield	Narrow sense	Not reported	0.38	0.058	Camara and Symonds 2014	Family variance components	Not reported
Green lipped mussel	Perna canaliculus	Survival in air	Narrow sense	Not reported	0.33	0.116	Camara and Symonds 2014	Family variance components	Not reported
Green lipped mussel	Perna canaliculus	Gonad condition	Narrow sense	Not reported	0.2	0.055	Camara and Symonds 2014	Family variance components	Not reported
Green lipped mussel	Perna canaliculus	Weight of fouling organisms	Narrow sense	Not reported	0.03	0.068	Camara and Symonds 2014	Family variance components	Not reported
Pacific oyster	Crassostrea gigas	Yield	Narrow sense	15236	0.59	0.01	de Melo et al. 2016	Family variance components	N
Pacific oyster	Crassostrea gigas	Survival	Narrow sense	15236	0.35	0.02	de Melo et al. 2016	Family variance components	N
Pacific oyster	Crassostrea gigas	Weight	Narrow sense	15236	0.55	0.01	de Melo et al. 2016	Family variance components	N
Pacific oyster	Crassostrea gigas	Yield	Realized	15236	0.55	0.24	de Melo et al. 2016	Response to selection	N	average over five generations of selection
Pacific oyster	Crassostrea gigas	Survival	Realized	15236	0.4	0.25	de Melo et al. 2016	Response to selection	N	average over five generations of selection
Pacific oyster	Crassostrea gigas	Weight	Realized	15236	0.68	0.22	de Melo et al. 2016	Response to selection	N	average over five generations of selection
Pacific oyster	Crassostrea gigas	Mortality	Realized	Not explicit	0.64	0.07	Degremont et al. 2010	Response to selection	N
Pacific oyster	Crassostrea gigas	Survival (exposure to OsHV-1 at 1 gram)	Realized	Not explicit	0.41	0.03	Degremont et al. 2015	Response to selection	N
Pacific oyster	Crassostrea gigas	Survival (exposure to OsHV-1 at >3 grams)	Realized	Not explicit	0.52	0.03	Degremont et al. 2015	Response to selection	N
Akoya pearl oyster	Pinctada martensii	Shell length (larval)	Realized	Not explicit	0.373333	0.0733333	Deng et al. 2009	Response to selection	N	average across three salinities
Pacific oyster	Crassostrea gigas	Body weight (adult)	Narrow sense	5850	0.313	0.083	Evans and Langdon 2006	Midparent offspring regression	N
Pacific oyster	Crassostrea gigas	Shell pigmentation	Broad sense	647	0.91	0.38	Evans et al. 2009	Full-sib intraclass correlation	N
Pacific oyster	Crassostrea gigas	Shell pigmentation	Narrow sense	647	0.59	0.19	Evans et al. 2009	Midparent offspring regression	N
Chilean blue mussel	Mytilus chilensis	Shell thickness	Narrow sense	345	0.294	0.194	Guinez et al. 2016	Family variance components	N
Chilean blue mussel	Mytilus chilensis	Shell length	Narrow sense	351	0.731	0.379	Guinez et al. 2016	Family variance components	N
Hard clam	Mercenaria mercenaria	Growth	Realized	3454	0.42	0.1	Hadley et al. 1991	Response to selection	N	n is sum of all ages and replicates
Pearl oyster	Pinctada fucata	Shell height	Realized	200	0.713	0.208	He et al. 2008	Response to selection	N
Catarina scallop	Argopecten ventricosus	Total weight	Realized	693	0.43	0.09	Ibarra et al. 1999	Response to selection	N	h2 from experiment 1, corrected means
Catarina scallop	Argopecten ventricosus	Shell width	Realized	638	0.14	0.07	Ibarra et al. 1999	Response to selection	N	h2 from experiment 1, corrected means
Oyster	Saccostrea cucullata	Growth rate	Realized	Not explicit	0.28	0.006	Jarayabhand and Thavornyutikarn 1995	Response to selection	N
Silver lipped pearl oyster	Pinctada maxima	Pearl weight	Narrow sense	2200	0.15	0.06	Jerry et al. 2012	Family variance components	Y	H2 estimates for donor oysters, n is summed across treatments and locations
Silver lipped pearl oyster	Pinctada maxima	Pearl size	Narrow sense	2200	0.13	0.05	Jerry et al. 2012	Family variance components	Y	H2 estimates for donor oysters, n is summed across treatments and locations
Silver lipped pearl oyster	Pinctada maxima	Pearl shape	Narrow sense	1968	0.06	0.03	Jerry et al. 2012	Family variance components	Y	H2 estimates for donor oysters, n is summed across treatments and locations
Silver lipped pearl oyster	Pinctada maxima	Pearl complexion	Narrow sense	1968	0.25	0.07	Jerry et al. 2012	Family variance components	Y	H2 estimates for donor oysters, n is summed across treatments and locations
Silver lipped pearl oyster	Pinctada maxima	Pearl colour	Narrow sense	1968	0.15	0.05	Jerry et al. 2012	Family variance components	Y	H2 estimates for donor oysters, n is summed across treatments and locations
Silver lipped pearl oyster	Pinctada maxima	Pearl lustre	Narrow sense	1968	0.14	0.06	Jerry et al. 2012	Family variance components	Y	H2 estimates for donor oysters, n is summed across treatments and locations
Red abalone	Haliotis rufescens	Survival	Narrow sense	Not explicit	0.11		Jonasson et al. 1999	Family variance components	N
Red abalone	Haliotis rufescens	Shell length (8 months)	Narrow sense	9648	0.08		Jonasson et al. 1999	Family variance components	N
Red abalone	Haliotis rufescens	Shell length (10 months)	Narrow sense	5859	0.06		Jonasson et al. 1999	Family variance components	N
Red abalone	Haliotis rufescens	Shell length (18 months)	Narrow sense	4536	0.27		Jonasson et al. 1999	Family variance components	N
Red abalone	Haliotis rufescens	Shell length (24 months)	Narrow sense	3055	0.34		Jonasson et al. 1999	Family variance components	N
Silver lipped pearl oyster	Pinctada maxima	Shell height (dorsal-ventral)	Narrow sense	341	0.286	0.126	Jones et al. 2014	Family variance components	Y
Silver lipped pearl oyster	Pinctada maxima	Shell length (anterior-posterior)	Narrow sense	341	0.328	0.128	Jones et al. 2014	Family variance components	Y
Silver lipped pearl oyster	Pinctada maxima	Shell width	Narrow sense	341	0.128	0.081	Jones et al. 2014	Family variance components	Y
Silver lipped pearl oyster	Pinctada maxima	Wet weight	Narrow sense	341	0.183	0.103	Jones et al. 2014	Family variance components	Y
Pacific oyster	Crassostrea gigas	Shell height	Narrow sense	270	0.49	0.25	Kong et al. 2015	Family variance components	Y
Pacific oyster	Crassostrea gigas	Shell length	Narrow sense	270	0.36	0.19	Kong et al. 2015	Family variance components	Y
Pacific oyster	Crassostrea gigas	Shell width	Narrow sense	270	0.45	0.23	Kong et al. 2015	Family variance components	Y
Pacific oyster	Crassostrea gigas	Wet weight	Narrow sense	270	0.35	0.17	Kong et al. 2015	Family variance components	Y
Silver lipped pearl oyster	Pinctada maxima	Shell height (dorsal-ventral)	Narrow sense	2313	0.15	0.02	Kvingedal et al. 2010	Family variance components	Y
Silver lipped pearl oyster	Pinctada maxima	Shell length (anterior posterior)	Narrow sense	2315	0.23	0.03	Kvingedal et al. 2010	Family variance components	Y
Silver lipped pearl oyster	Pinctada maxima	Shell width	Narrow sense	2316	0.11	0.009	Kvingedal et al. 2010	Family variance components	Y
Silver lipped pearl oyster	Pinctada maxima	Wet weight	Narrow sense	2316	0.21	0.02	Kvingedal et al. 2010	Family variance components	Y
Pacific oyster	Crassostrea gigas	Shell height	Realized	Not explicit	0.3	0.03	Li et al. 2011	Response to selection	N	average of three strains
Tropical abalone	Haliotis asinina	Shell width	Narrow sense	465	0.38	0.13	Lucas et al. 2006	Family variance components	Y
Tropical abalone	Haliotis asinina	Shell length	Narrow sense	465	0.48	0.15	Lucas et al. 2006	Family variance components	Y
Tropical abalone	Haliotis asinina	Wet weight	Narrow sense	465	0.36	0.13	Lucas et al. 2006	Family variance components	Y
Blue mussel	Mytilus galloprovincialis	Total weight	Narrow sense	1538	0.051	0.027	Nguyen et al. 2011	Family variance components	Y
Blue mussel	Mytilus galloprovincialis	Shape	Narrow sense	1538	0.085	0.038	Nguyen et al. 2011	Family variance components	Y
Blue mussel	Mytilus galloprovincialis	Meat yield	Narrow sense	1538	0.049	0.028	Nguyen et al. 2011	Family variance components	Y
Blue mussel	Mytilus galloprovincialis	Total weight	Narrow sense	3224	0.35	0.09	Nguyen et al. 2014	Family variance components	Y	estimate of meat yield MY1
Blue mussel	Mytilus galloprovincialis	Shape	Narrow sense	3224	0.64	0.1	Nguyen et al. 2014	Family variance components	Y	estimate of meat yield MY1
Blue mussel	Mytilus galloprovincialis	Meat yield	Narrow sense	3224	0.23	0.08	Nguyen et al. 2014	Family variance components	Y	estimate of meat yield MY1
Blue mussel	Mytilus galloprovincialis	Okadaic acid toxin accumulation	Narrow sense	2150	0.371	0.079	Pino-Querido et al. 2015	Family variance components	Y	accumulation group estimates
Blue mussel	Mytilus galloprovincialis	Mantle colour	Narrow sense	2150	0.962	0.023	Pino-Querido et al. 2015	Family variance components	Y	accumulation group estimates
Blue mussel	Mytilus galloprovincialis	Shell length	Narrow sense	2150	0.227	0.068	Pino-Querido et al. 2015	Family variance components	Y	accumulation group estimates
Blue mussel	Mytilus galloprovincialis	Body weight	Narrow sense	2150	0.392	0.078	Pino-Querido et al. 2015	Family variance components	Y	accumulation group estimates
Chilean oyster	Ostrea chilensis	Shell height	Realized	2997	0.34	0.12	Toro and Newkirk 1991	Response to selection	N
Chilean blue mussel	Mytilus chilensis	Shell height (larval)	Narrow sense	3314	0.38	0.33	Toro et al. 2004	Family variance components	N
Chilean blue mussel	Mytilus chilensis	Shell height (spat)	Narrow sense	802	0.84	0.45	Toro et al. 2004	Family variance components	N
Pearl oyster	Pinctada fucata	Shell length	Narrow sense	4320	0.64	0.1	Wang et al. 2010	Family variance components	N
Pearl oyster	Pinctada fucata	Shell height	Narrow sense	4320	0.49	0.06	Wang et al. 2010	Family variance components	N
Pearl oyster	Pinctada fucata	Shell breadth	Narrow sense	4320	0.38	0.14	Wang et al. 2010	Family variance components	N
Pearl oyster	Pinctada fucata	Hinge length	Narrow sense	4320	0.41	0.12	Wang et al. 2010	Family variance components	N
Pearl oyster	Pinctada fucata	Body weight	Narrow sense	4320	0.53	0.11	Wang et al. 2010	Family variance components	N
Pearl oyster	Pinctada fucata	Tissue weight	Narrow sense	4320	0.35	0.07	Wang et al. 2010	Family variance components	N
Pearl oyster	Pinctada fucata	Shell weight	Narrow sense	4320	0.67	0.1	Wang et al. 2010	Family variance components	N
Pearl oyster	Pinctada fucata	Shell length	Broad sense	4320	0.78	0.12	Wang et al. 2010	Family variance components	N
Pearl oyster	Pinctada fucata	Shell height	Broad sense	4320	0.63	0.09	Wang et al. 2010	Family variance components	N
Pearl oyster	Pinctada fucata	Shell breadth	Broad sense	4320	0.54	0.13	Wang et al. 2010	Family variance components	N
Pearl oyster	Pinctada fucata	Hinge length	Broad sense	4320	0.56	0.11	Wang et al. 2010	Family variance components	N
Pearl oyster	Pinctada fucata	Body weight	Broad sense	4320	0.68	0.08	Wang et al. 2010	Family variance components	N
Pearl oyster	Pinctada fucata	Tissue weight	Broad sense	4320	0.55	0.08	Wang et al. 2010	Family variance components	N
Pearl oyster	Pinctada fucata	Shell weight	Broad sense	4320	0.75	0.14	Wang et al. 2010	Family variance components	N
Bay scallop	Argopecten irradians	Shell length	Realized	Not explicit	0.38	0.06	Wang et al. 2014	Response to selection	N
Bay scallop	Argopecten irradians	Body weight	Realized	Not explicit	0.22	0.07	Wang et al. 2014	Response to selection	N
Manila clam	Ruditapes philippinarum	Shell length (9 days)	Narrow sense	Not explicit	0.17	0.09	Yan et al. 2014	Family variance components	N	estimate from paternal half-sibs in cultured population
Manila clam	Ruditapes philippinarum	Shell length (30 days)	Narrow sense	Not explicit	0.87	0.24	Yan et al. 2014	Family variance components	N	estimate from paternal half-sibs in cultured population
Manila clam	Ruditapes philippinarum	Shell length	Realized	572	0.165		Zhao et al. 2012	Response to selection	N
Bay scallop	Argopecten irradians	Shell length (larval)	Realized	Not explicit	0.511	0.01	Zheng et al. 2004	Response to selection	N	estimates from stock B
Bay scallop	Argopecten irradians	Shell length (spat)	Realized	Not explicit	0.341	0.022	Zheng et al. 2004	Response to selection	N	estimates from stock B
Bay scallop	Argopecten irradians	Shell length (grow-out)	Realized	Not explicit	0.338	0.015	Zheng et al. 2004	Response to selection	N	estimates from stock B
* Family variance components estimation refers to mixed-model based estimation procedures, such as with an animal model

## Sheet: Genetic Correlations
common.name	scientific.name	trait	reference
Silver lipped pearl oyster	Pinctada maxima	Pearl weight	Jerry et al. 2012
Silver lipped pearl oyster	Pinctada maxima	Pearl size	Jerry et al. 2012
Silver lipped pearl oyster	Pinctada maxima	Pearl shape	Jerry et al. 2012
Silver lipped pearl oyster	Pinctada maxima	Pearl complexion	Jerry et al. 2012
Silver lipped pearl oyster	Pinctada maxima	Pearl colour	Jerry et al. 2012
Silver lipped pearl oyster	Pinctada maxima	Pearl lustre	Jerry et al. 2012
Blue mussel	Mytilus galloprovincialis	Okadaic acid toxin accumulation	Pino-Querido et al. 2015
Blue mussel	Mytilus galloprovincialis	Mantle colour	Pino-Querido et al. 2015
Blue mussel	Mytilus galloprovincialis	Shell length	Pino-Querido et al. 2015
Blue mussel	Mytilus galloprovincialis	Body weight	Pino-Querido et al. 2015
Tropical abalone	Haliotis asinina	Wet weight	Lucas et al. 2006
Tropical abalone	Haliotis asinina	Shell width	Lucas et al. 2006
Tropical abalone	Haliotis asinina	Shell length	Lucas et al. 2006
Silver lipped pearl oyster	Pinctada maxima	Shell length (dorsal-ventral)	Kvingedal et al. 2010
Silver lipped pearl oyster	Pinctada maxima	Shell length (anterior posterior)	Kvingedal et al. 2010
Silver lipped pearl oyster	Pinctada maxima	Shell width	Kvingedal et al. 2010
Silver lipped pearl oyster	Pinctada maxima	Wet weight	Kvingedal et al. 2010
Pacific oyster	Crassostrea gigas	Yield	de Melo et al. 2016
Pacific oyster	Crassostrea gigas	Survival	de Melo et al. 2016
Pacific oyster	Crassostrea gigas	Weight	de Melo et al. 2016
Pacific oyster	Crassostrea gigas	Growth	Degremont et al. 2007
Pacific oyster	Crassostrea gigas	Survival	Degremont et al. 2007
Silver lipped pearl oyster	Pinctada maxima	Shell height (dorsal-ventral)	Jones et al. 2014
Silver lipped pearl oyster	Pinctada maxima	Shell length (anterior-posterior)	Jones et al. 2014
Silver lipped pearl oyster	Pinctada maxima	Shell width	Jones et al. 2014
Silver lipped pearl oyster	Pinctada maxima	Wet weight	Jones et al. 2014
Catarina scallop	Argopecten ventricosus	Shell width	Ibarra et al. 1999
Pacific oyster	Crassostrea gigas	Shell height	Kong et al. 2015
Pacific oyster	Crassostrea gigas	Shell length	Kong et al. 2015
Pacific oyster	Crassostrea gigas	Shell width	Kong et al. 2015
Pacific oyster	Crassostrea gigas	Wet weight	Kong et al. 2015
Red abalone	Haliotis rufescens	Survival	Jonasson et al. 1999
Red abalone	Haliotis rufescens	Shell length (8 months)	Jonasson et al. 1999
Red abalone	Haliotis rufescens	Shell length (10 months)	Jonasson et al. 1999
Red abalone	Haliotis rufescens	Shell length (18 months)	Jonasson et al. 1999
Red abalone	Haliotis rufescens	Shell length (24 months)	Jonasson et al. 1999
Chilean mussel	Mytilus chilensis	Shell thickness	Guinez et al. 2016
Chilean mussel	Mytilus chilensis	Shell length	Guinez et al. 2016

## Sheet: GxE Interactions
common.name	scientific.name	trait	environment	effect	reference	notes
Silver lipped pearl oyster	Pinctada maxima	Pearl weight	geographic (grow-out)	0.34 ± 0.57	Jerry et al. 2012
Silver lipped pearl oyster	Pinctada maxima	Pearl size	geographic (grow-out)	0.22 ± 0.58	Jerry et al. 2012
Silver lipped pearl oyster	Pinctada maxima	Pearl shape	geographic (grow-out)	0.56 ± 0.39	Jerry et al. 2012
Silver lipped pearl oyster	Pinctada maxima	Pearl complexion	geographic (grow-out)	0.56 ± 0.39	Jerry et al. 2012
Silver lipped pearl oyster	Pinctada maxima	Pearl colour	geographic (grow-out)	0.28 ± 0.36	Jerry et al. 2012
Silver lipped pearl oyster	Pinctada maxima	Pearl lustre	geographic (grow-out)	0.59 ± 0.47	Jerry et al. 2012
Silver lipped pearl oyster	Pinctada maxima	Shell length (dorsal-ventral)	geographic (grow-out)	0.92±0.017	Kvingedal et al. 2010	estimates from 14 months
Silver lipped pearl oyster	Pinctada maxima	Shell length (anterior posterior)	geographic (grow-out)	0.99±0.00	Kvingedal et al. 2010	estimates from 14 months
Silver lipped pearl oyster	Pinctada maxima	Shell width	geographic (grow-out)	0.99±0.00	Kvingedal et al. 2010	estimates from 14 months
Silver lipped pearl oyster	Pinctada maxima	Wet weight	geographic (grow-out)	0.99±0.17	Kvingedal et al. 2010	estimates from 14 months
Pacific oyster	Crassostrea gigas	Body weight (adult)	intertidal/subtidal	0.53±0.13	Evans and Langdon 2006	Effect estimates are means from all site comparisons
Pacific oyster	Crassostrea gigas	Survival	intertidal/subtidal	0.68±0.12	Evans and Langdon 2006	Effect estimates are means from all site comparisons
Pacific oyster	Crassostrea gigas	Yield	intertidal/subtidal	0.61±0.13	Evans and Langdon 2006	Effect estimates are means from all site comparisons
Pacific oyster	Crassostrea gigas	Yield	intertidal/subtidal	0.325	Langdon et al. 2003	Effect estimates are means from cohorts
Red abalone	Haliotis rufescens	Shell length (18 months)	farm	0.94	Jonasson et al. 1999
Red abalone	Haliotis rufescens	Shell length (24 months)	farm	0.95	Jonasson et al. 1999

## Sheet: Response to Selection
common.name	scientific.name	group	trait	trait.type	selection.type	num.gen	response.per.gen	reference	notes
Small abalone	Haliotis diversicolor	abalone	Shell length	growth	family	4	9.2	Liu et al. 2015
Small abalone	Haliotis diversicolor	abalone	Survival	survival	family	4	4.1	Liu et al. 2015
Hard clam	Mercenaria mercenaria	clam	Growth	growth	mass	1	15.4	Hadley et al. 1991	average of experiments 1 and 3
Manila clam	Ruditapes philippinarum	clam	Shell length	growth	mass	1	3.55	Zhao et al. 2012
Blue mussel	Mytilus galloprovincialis	mussel	Total weight	growth	family	1	10	Nguyen et al. 2014
Chilean mussel	Mytilus chilensis	mussel	Growth	growth	mass	1	3.5	Toro et al. 2004	average of range midpoints for live weight (3.3%) and shell height (3.7%)
Blue mussel	Mytilus galloprovincialis	mussel	Shell shape	shape	family	1	3	Nguyen et al. 2014
Blue mussel	Mytilus galloprovincialis	mussel	Meat yield	yield	family	1	2.3	Nguyen et al. 2014
Pacific oyster	Crassostrea gigas	oyster	Survival (exposure to OsHV-1)	disease resistance	mass	4	16.15	Degremont et al. 2015	average of 1g (12.1%) and 3g (20.2%)
Pacific oyster	Crassostrea gigas	oyster	Mortality (summer mortality)	disease resistance	mass	2	18.75	Degremont et al. 2010	average of G2 and G3 for Riviere d'Aurey
Sydney rock oyster	Saccostrea glomerata	oyster	Resistance to QW disease	disease resistance	mass	4	12.08	Dove et al. 2013	average across three lines (17.25%, 15%, 4%)
Chilean oyster	Ostrea chilensis	oyster	Growth	growth	mass	1	16.72	Toro et al. 1996	average gain across localities and growth traits
Akoya pearl oyster	Pinctada martensii	oyster	Shell length (larval)	growth	mass	1	7.46	Deng et al. 2009	average across ages and salinities
European oyster	Ostrea edulis	oyster	Growth	growth	mass	1	23	Newkirk and Haley 1982
Pacific oyster	Crassostrea gigas	oyster	Weight	growth	family	5	2.26	de Melo et al. 2016
Pearl oyster	Pinctada fucata	oyster	Shell height	growth	mass	1	16.03	He et al. 2008	average across ages
Pacific oyster	Crassostrea gigas	oyster	Shell height	growth	mass	2	10	Wang et al. 2012
Sydney rock oyster	Saccostrea glomerata	oyster	Weight	growth	mass	2	9	Nell et al. 1999
Pacific oyster	Crassostrea gigas	oyster	Survival	survival	family	5	3.14	de Melo et al. 2016
Pacific oyster	Crassostrea gigas	oyster	Yield	yield	family	5	3.8	de Melo et al. 2016
Bay scallop	Argopecten irradians	scallop	Shell length	growth	mass	2	8.78	Zheng et al. 2006
Bay scallop	Argopecten irradians	scallop	Shell length	growth	mass	1	7.66	Wang et al. 2014	average of gain for shell length (7.16%) and body weight (8.16%)
Catarina scallop	Argopecten ventricosus	scallop	Total weight	growth	mass	1	16.3	Ibarra et al. 1999
