# Supplementary material for: Genomic Tools and Selective Breeding in Molluscs
Source: Front Genet. 2018 Jul 18;9:253. doi: 10.3389/fgene.2018.00253 (PMC6058216; doi:10.3389/fgene.2018.00253)
Supplement: Supplementary file 2 [file Data_Sheet_2.xlsx]

## Sheet: Genetic Marker Panels
common.name	scientific.name	num.markers	marker.type	assay.type	group	references
South African abalone	Haliotis midae	234	SNP	Illumina GoldenGate	abalone	Bester-Van Der Merwe et al. (2013)
Grooved carpet shell	Ruditapes decussatus	12	Msat	Multiplex	clam	Borrell et al. (2014)
Banded carpet shell	Venerupis rhomboides	13	Msat	Multiplex	clam	Chacón et al. (2012)
Pacific oyster	Crassostrea gigas	55	SNP	High-resolution melting	oyster	Jin et al. (2013)
Silver-lipped pearl oyster	Pinctada maxima	2782	SNP	Illumina Infinium	oyster	Jones et al. (2013)
Pacific oyster	Crassostrea gigas	384	SNP	Illumina Goldengate	oyster	Lapègue et al. (2014)
European flat oyster	Ostrea edulis	384	SNP	Illumina Goldengate	oyster	Lapègue et al. (2014)
Ark shell	Scapharca broughtonii	8	Msat	Multiplex	clam	Li et al. (2016)
Pacific oyster	Crassostrea gigas	12	Msat	Multiplex	oyster	Li et al. (2010)
King scallop	Pecten maximus	12	Msat	Multiplex	scallop	Morvezen et al. (2013)
Blue mussel	Mytilus galloprovincialis	227	SNP	Sequenom iPLEX	mussel	Nguyen et al. (2014)
Blue mussel	Mytilus galloprovincialis	10	Msat	Multiplex	mussel	Nguyen et al. (2011)
Zhikong scallop	Chlamys farreri	12	Msat	Multiplex	scallop	Nie et al. (2012)
Lion-paw scallop	Nodipecten subnodosus	6	Msat	Multiplex	scallop	Petersen et al. (2008)
Blue mussel	Mytilus galloprovincialis	9	Msat	Multiplex	mussel	Pino-Querido et al. (2014)
Pacific oyster	Crassostrea gigas	53	SNP	High-resolution melting	oyster	Sun et al. (2015)
Vietnamese commercial clam	Lutraria rhynchaena	12	Msat	Multiplex	clam	Thai et al. (2016)
South African abalone	Haliotis midae	9	Msat	Multiplex	abalone	van den Bergb and Roodt-Wilding (2010)
Pacific oyster	Crassostrea gigas	1301	SNP	High-resolution melting	oyster	Wang et al. (2015)
Eastern oyster	Crassostrea virginica	16	Msat	Multiplex	oyster	Wang et al. (2010)
Pacific oyster	Crassostrea gigas	40625	SNP	Affymetrix Axiom Array	oyster	Gutierrez et al. (2017)
European flat oyster	Ostrea edulis	14950	SNP	Affymetrix Axiom Array	oyster	Gutierrez et al. (2017)
Pacific oyster	Crassostrea gigas	190420	SNP	Affymetrix Axiom Array	oyster	Qi et al. (2017)
Presented data based on microsatellite multiplexes and SNP panels with > 50 SNPs

## Sheet: Genomes
common.name	scientific.name	technology	assembly.level	num.scaffolds	scaffold.n50	num.contigs	contig.n50	coverage	predicted.genes	reference	notes
Pacific oyster	Crassostrea gigas	Illumina	scaffold	7659	401685	30460	31239	100x	28027	Zhang et al. (2012)
Pearl oyster	Pinctada fucata	Illumina	scaffold	29306	167000	77192	21300	193x	23516	Takeuchi et al. (2012, 2016)
Mediterranean mussel	Mytilus galloprovincialis	Illumina	scaffold	1746447	2651	2300000	846	32x	10891	Nguyen et al. (2014), Murgarella et al. (2016)	Scaffold N50 from Murgarella et al. (2016), Contig N50 from Nguyen et al. 2014
Manila clam	Ruditapes philippinarum	Illumina	scaffold	13411	119518	NA	NA	40X	41275	Mun et al. (2017)	Summary statistics from Haploview assembly; contig number and N50 not reported.
Zhikong scallop	Chlamys farreri	Illumina/PacBio	scaffold	96024	602000	148999	21500	382x	26602	Li et al. (2017)
Eastern oyster	Crassostrea virginica	PacBio	chromosome	11	75944018	669	1971208	87x	60213	Abdelrahman et al. (2017); NCBI GenBank	Not currently published: stats obtained from GenBank
Yesso scallop	Patinopecten yessoensis	Illumina	scaffold	82731	803631	145537	38000	297x	26415	Wang et al. (2017)

## Sheet: Linkage Maps
common.name	scientific.name	sex	marker.type	num.markers	avg.marker.interval	linkage.groups	group	reference	notes
Japanese scallop	Patinopecten yessoensis	Female	AFLP;Msat	187;4	15.6	20	scallop	Xu et al. (2008)
Japanese scallop	Patinopecten yessoensis	Male	AFLP;Msat	192;2	14.7	21	scallop	Xu et al. (2008)
Blacktip abalone	Haliotis rubra	Female	Msat	98	9.8	20	abalone	Baranski et al. (2006)
Blue mussel	Mytilus edulis	Male	AFLP	116	8.09	14	mussel	Lallias et al. (2007)
Blue mussel	Mytilus edulis	Female	AFLP	121	8	14	mussel	Lallias et al. (2007)
Blacktip abalone	Haliotis rubra	Male	Msat	102	7.3	17	abalone	Baranski et al. (2006)
South African abalone	Haliotis midae	Combined	SNP;Msat	70;116	6.88	18	abalone	Vervalle et al. (2013)
Pacific abalone	Haliotis discus	Female	Msat	160	6.3	19	abalone	Liu et al. (2006), Sekino and Hara (2007)	Data reported from Sekino and Hara (2007)
Pacific abalone	Haliotis discus	Male	Msat	167	4.7	18	abalone	Liu et al. (2006), Sekino and Hara (2007)	Data reported from Sekino and Hara (2007)
Bay scallop	Agropecten irradians	Combined	Msat	161	5.9	16	scallop	Qin et al. (2007a, 2007b), Wang et al. (2007), Li et al. (2012)	Data reported from Li et al. (2012)
Eastern oyster	Crassostrea virginica	Male	AFLP;Msat	145	5.7	12	oyster	Yu and Guo (2003, 2006)	Data reported from Yu and Guo (2006)
Eastern oyster	Crassostrea virginica	Female	AFLP;Msat	149	3.1	10	oyster	Yu and Guo (2003, 2006)	Data reported from Yu and Guo (2006)
Pacific lion-paw scallop	Nodipecten subnodosus	Combined	AFLP;Msat	264;56	3.8	22	scallop	Petersen et al. (2012)
European flat oyster	Ostrea edulis L.	Combined	AFLP;Msat;SNP	157;17;119	3	10	oyster	Lallias et al. (2007), Harrang et al. (2015)	Data reported from Harrang et al. (2015) Family 3
Triangle pearl mussel	Hyriopsis cumingii	Combined	SNP;Msat	4508;475	1.81	19	mussel	Bai et al. (2015, 2016)
Pearl oyster	Pinctada fucata	Combined	SNP	1373	1.41	14	oyster	Li and Hi (2014)
Pacific oyster	Crassostrea gigas	Combined	SNP;Msat	607;49	1.4	10	oyster	Li and Guo (2004), Hubert and Hedgecock (2004), Guo et al. (2012), Zhong et al. (2014), Hedgecock et al. (2015)e	Data reported from Hedgecock et al. (2015) consensus map based on five familes and >1100 loci mapped
Silver-lipped pearl oyster	Pinctada maxima	Combined	SNP	887	0.94	14	oyster	Jones et al. (2013)
Pacific oyster x Portuguese oyster	Crassostrea gigas x Crassostrea angulata	Combined	SNP	1695	0.8	10	oyster	Wang et al. (2016)	1695 RAD loci containing 3367 SNPs
Zhikong scallop	Chlamys farrei	Male	SNP	1861	0.62	19	scallop	Li et al. (2005), Zhan et al. (2009), Jiao et al. (2014)
Zhikong scallop	Chlamys farrei	Female	SNP	2025	0.59	19	scallop	Li et al. (2005), Zhan et al. (2009), Jiao et al. (2014)
Small abalone	Haliotis diversicolor	Combined	SNP	3717	0.59	16	abalone	Shi et al. (2010), Zhan et al. (2012), Ren et al. (2016)	Data reported from Ren et al. (2016)
Akoya pearl oyster	Pinctada martensii	Combined	SNP	3117	0.39	14	oyster	Shi et al. (2009, 2014)	Data reported from Shi et al. (2014)
Manila clam	Ruditapes philippinarum	Combined	SNP	9658	0.42	18	clam	Nie et al. (2017)

## Sheet: QTLs
common.name	scientific.name	trait	trait.type	num.loci	reference	group	year	notes
Eastern oyster	Crassostrea virginica	Dermo/summer resistance	disease resistance	12	Yu and Guo (2006)	oyster	2006
Bay scallop	Agropecten irradians	Shell width	growth	1	Li et al. (2012)	scallop	2012
Bay scallop	Agropecten irradians	Total weight	growth	1	Li et al. (2012)	scallop	2012
Bay scallop	Agropecten irradians	Shell height	growth	1	Li et al. (2012)	scallop	2012
Bay scallop	Agropecten irradians	Body size	growth	1	Qin et al. (2007a)	scallop	2007
Bay scallop	Agropecten irradians	Shell colour	colour	6	Qin et al. (2007b)	scallop	2007
Blacktip abalone	Haliotis rubra	Growth rate	growth	10	Baranski et al. (2008)	abalone	2008
Pacific oyster	Crassostrea gigas	Shell pigmentation	colour	1	Ge et al. (2014)	oyster	2014
Pacific oyster	Crassostrea gigas	Growth rate	growth	3	Guo et al. (2012)	oyster	2012
Pacific oyster	Crassostrea gigas	Sex	sex	1	Guo et al. (2012)	oyster	2012
European flat oyster	Ostrea edulis	Mortality from Bonamia ostreae infection	disease resistance	5	Harrang et al. (2015)	oyster	2015
European flat oyster	Ostrea edulis	Bonamia ostreae parasite load	disease resistance	1	Harrang et al. (2015)	oyster	2015
Zhikong scallop	Chlamys farrei	Growth	growth	2	Jiao et al. (2014)	scallop	2014
Zhikong scallop	Chlamys farrei	Sex	sex	1	Jiao et al. (2014)	scallop	2014
Silver-lipped pearl oyster	Pinctada maxima	Pearl colour	pearl quality	34	Jones et al. (2014)	oyster	2014	9 QTLs and 25 marker associations
Silver-lipped pearl oyster	Pinctada maxima	Pearl surface complexion	pearl quality	1	Jones et al. (2014)	oyster	2014
Silver-lipped pearl oyster	Pinctada maxima	Pearl size and weight	pearl quality	3	Jones et al. (2014a)	oyster	2014	3 marker associations
Silver-lipped pearl oyster	Pinctada maxima	Shell height	growth	2	Jones et al. (2014b)	oyster	2014
Silver-lipped pearl oyster	Pinctada maxima	Shell length	growth	4	Jones et al. (2014b)	oyster	2014	4 marker associations
Silver-lipped pearl oyster	Pinctada maxima	Shell width	growth	3	Jones et al. (2014b)	oyster	2014
Silver-lipped pearl oyster	Pinctada maxima	Shell weight	growth	1	Jones et al. (2014b)	oyster	2014
European flat oyster	Ostrea edulis	Bonamia ostreae resistance	disease resistance	9	Lallias et al. (2009)	oyster	2009	3 marker associations
European flat oyster	Ostrea edulis	Bonamia ostreae susceptibility	disease resistance	6	Lallias et al. (2009)	oyster	2009	4 marker associations
European flat oyster	Ostrea edulis	Mortality from Bonamia ostreae infection	disease resistance	3	Lallias et al. (2009)	oyster	2009
Pacific lion-paw scallop	Nodipecten subnodosus	Length	growth	2	Peterson et al. (2012)	scallop	2012
Pacific lion-paw scallop	Nodipecten subnodosus	Height	growth	1	Peterson et al. (2012)	scallop	2012
Pacific lion-paw scallop	Nodipecten subnodosus	Width	growth	5	Peterson et al. (2012)	scallop	2012
Pacific lion-paw scallop	Nodipecten subnodosus	Total mass	growth	2	Peterson et al. (2012)	scallop	2012
Pacific lion-paw scallop	Nodipecten subnodosus	Soft tissue mass	growth	1	Peterson et al. (2012)	scallop	2012
Pacific lion-paw scallop	Nodipecten subnodosus	Muscle mass	growth	4	Peterson et al. (2012)	scallop	2012
Pacific lion-paw scallop	Nodipecten subnodosus	Muscle mass (maturation as covariate)	growth	3	Peterson et al. (2012)	scallop	2012
Pacific lion-paw scallop	Nodipecten subnodosus	Size (PCA of six size-related traits)	growth	3	Peterson et al. (2012)	scallop	2012
Pacific lion-paw scallop	Nodipecten subnodosus	Orange shell colour	colour	1	Peterson et al. (2012)	scallop	2012
Pacific oyster	Crassostrea gigas	Viability	viability	14	Plough and Hedgecock (2011)	oyster	2011	Officially reported as 14-15
Small abalone	Haliotis diversicolor	Body weight	growth	2	Ren et al. (2016)	abalone	2016
Small abalone	Haliotis diversicolor	Foot muscle weight	growth	5	Ren et al. (2016)	abalone	2016
Small abalone	Haliotis diversicolor	Shell weight	growth	3	Ren et al. (2016)	abalone	2016
Small abalone	Haliotis diversicolor	Shell length	growth	1	Ren et al. (2016)	abalone	2016
Small abalone	Haliotis diversicolor	Shell width	growth	2	Ren et al. (2016)	abalone	2016
Small abalone	Haliotis diversicolor	Shell height	growth	2	Ren et al. (2016)	abalone	2016
Pacific oyster	Crassostrea gigas	Summer mortality	disease resistance	5	Sauvage et al. (2010)	oyster	2010
Pacific oyster	Crassostrea gigas	Ostreid Herpes virus 1 (OsHV-1) load	disease resistance	5	Sauvage et al. (2010)	oyster	2010
Akoya pearl oyster	Pinctada martensii	Shell nacrine nacre thickness	pearl quality	1	Shi et al. (2014)	oyster	2014
Akoya pearl oyster	Pinctada martensii	Inner non-necrine nacre covered shell length	pearl quality	1	Shi et al. (2014)	oyster	2014
Akoya pearl oyster	Pinctada martensii	Hinge line length	growth	1	Shi et al. (2014)	oyster	2014
Akoya pearl oyster	Pinctada martensii	Shell length	growth	1	Shi et al. (2014)	oyster	2014
Akoya pearl oyster	Pinctada martensii	Total weight	growth	2	Shi et al. (2014)	oyster	2014
Akoya pearl oyster	Pinctada martensii	Size	growth	1	Zhan et al. (2016)	oyster	2016	Single marker association with four size related traits
Pacific oyster	Crassostrea gigas	Glycogen content	taste	2	Zhong et al. (2014)	oyster	2014
Pacific oyster	Crassostrea gigas	Shell pigmentation	colour	1	Zhong et al. (2014)	oyster	2014
Triangle pearl mussel	Hyriopsis cumingii	Shell width	pearl quality	2	Bai et al. (2015)	mussel	2015
Triangle pearl mussel	Hyriopsis cumingii	Body weight	pearl quality	2	Bai et al. (2015)	mussel	2015
Triangle pearl mussel	Hyriopsis cumingii	Shell weight	pearl quality	3	Bai et al. (2015)	mussel	2015
Triangle pearl mussel	Hyriopsis cumingii	Margin mantle weight	pearl quality	3	Bai et al. (2015)	mussel	2015
Triangle pearl mussel	Hyriopsis cumingii	Inner mantle weight	pearl quality	3	Bai et al. (2015)	mussel	2015
Triangle pearl mussel	Hyriopsis cumingii	Shell nacre color	pearl quality	10	Bai et al. (2015)	mussel	2015
Triangle pearl mussel	Hyriopsis cumingii	Shell width	pearl quality	3	Bai et al. (2016)	mussel	2016
Triangle pearl mussel	Hyriopsis cumingii	Body weight	pearl quality	7	Bai et al. (2016)	mussel	2016
Triangle pearl mussel	Hyriopsis cumingii	Shell weight	pearl quality	2	Bai et al. (2016)	mussel	2016
Triangle pearl mussel	Hyriopsis cumingii	Margin mantle weight	pearl quality	2	Bai et al. (2016)	mussel	2016
Triangle pearl mussel	Hyriopsis cumingii	Inner mantle weight	pearl quality	5	Bai et al. (2016)	mussel	2016
Triangle pearl mussel	Hyriopsis cumingii	Purple mantle scar length	pearl quality	1	Bai et al. (2016)	mussel	2016
Triangle pearl mussel	Hyriopsis cumingii	Inner shell colour traits	pearl quality	6	Bai et al. (2016)	mussel	2016
Zhikong scallop	Chlamys farrei	Sex	sex	1	Li et al. (2005)	scallop	2005
Pacific oyster x Portuguese oyster	Crassostrea gigas x Crassostrea angulata	Shell height	growth	7	Wang et al. (2016)	oyster	2016
Pacific oyster x Portuguese oyster	Crassostrea gigas x Crassostrea angulata	Shell length	growth	3	Wang et al. (2016)	oyster	2016
Pacific oyster x Portuguese oyster	Crassostrea gigas x Crassostrea angulata	Shell width	growth	10	Wang et al. (2016)	oyster	2016
Pacific oyster x Portuguese oyster	Crassostrea gigas x Crassostrea angulata	Soft tissue weight	growth	6	Wang et al. (2016)	oyster	2016
Pacific oyster x Portuguese oyster	Crassostrea gigas x Crassostrea angulata	Mass weight	growth	1	Wang et al. (2016)	oyster	2016
Manila clam	Ruditapes philippinarum	Shell length	growth	3	Nie et al. (2017)	clam	2017
Manila clam	Ruditapes philippinarum	Shell height	growth	1	Nie et al. (2017)	clam	2017
Manila clam	Ruditapes philippinarum	Shell width	growth	1	Nie et al. (2017)	clam	2017
Manila clam	Ruditapes philippinarum	Wet weight	growth	1	Nie et al. (2017)	clam	2017
Manila clam	Ruditapes philippinarum	Body weight	growth	1	Nie et al. (2017)	clam	2017
Manila clam	Ruditapes philippinarum	Background colour	colour	2	Nie et al. (2017)	clam	2017
Manila clam	Ruditapes philippinarum	Stria	colour	1	Nie et al. (2017)	clam	2017
Significant (not suggestive) results reported
